# Supplementary material
Source: publisher figshare collection journal article supplement (https://future-science-group.figshare.com/ndownloader/files/30894586)
Supplement: Supplementary file 1 [file 30894586]

**SUPPORTING INFORMATION**

**Eugenol-acacia gum based bifunctional nanofibers as potent anti-fungal transdermal substitute**

**Figure S1:** The growth inhibiting activity of pure PVA, AG, EUG, CD, IC and blank NF was evaluated against A) *C. albicans* and; B) *C. glabrata* planktonic cells for 5 h in sabouraud dextrose broth. The inhibition was calculated in terms of CFU and represented as percent growth inhibition.


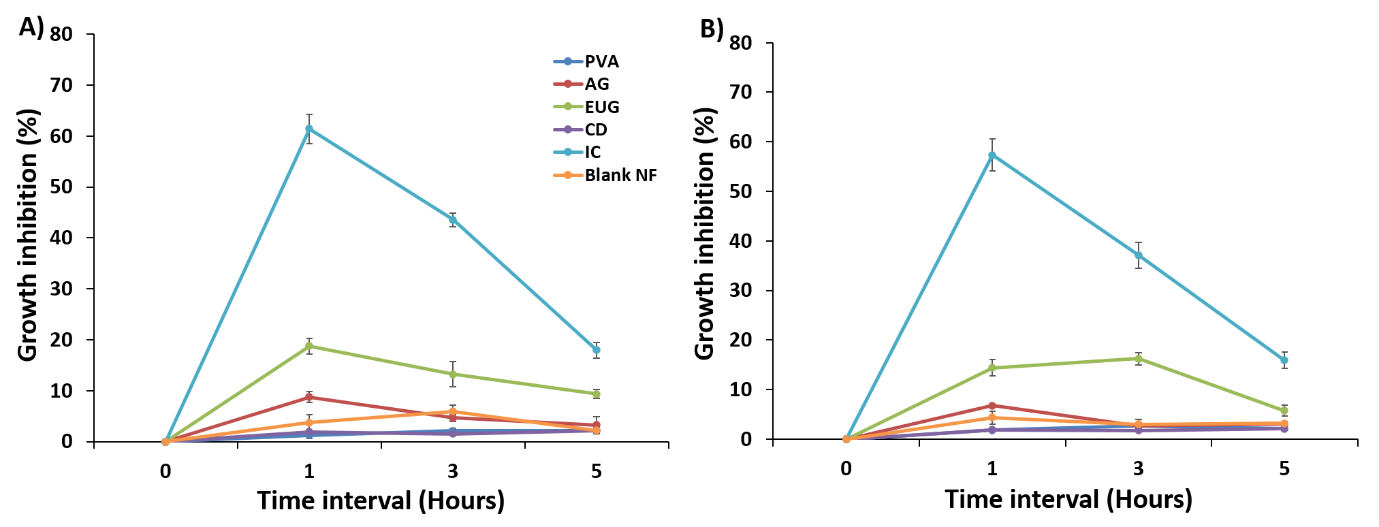


**Figure S2:** The biofilm A) inhibition; and B) eradication activity of free EG at different concentrations against CA and CG was studied in 96-well plate in RPMI media and biofilm was quantified in terms of metabolic activity using XTT reduction assay.


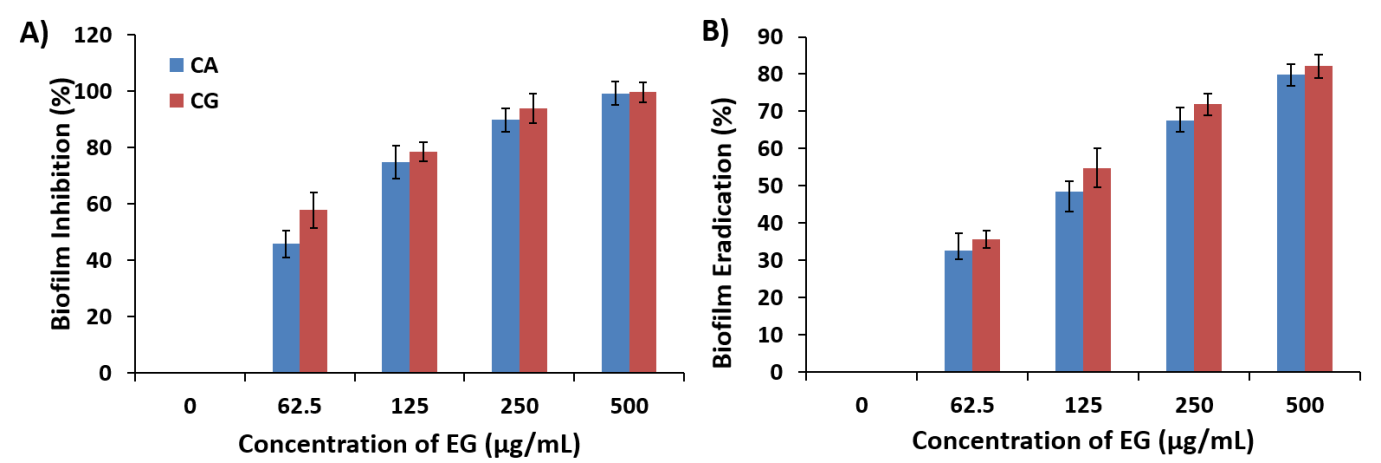


**Figure S3:** Surface roughness analysis of CA and CG biofilm treated with EG-NF as compared to control biofilm. For roughness calculation, AFM images of CA and CG biofilm samples were used in NOVA software, provided with the instrument.


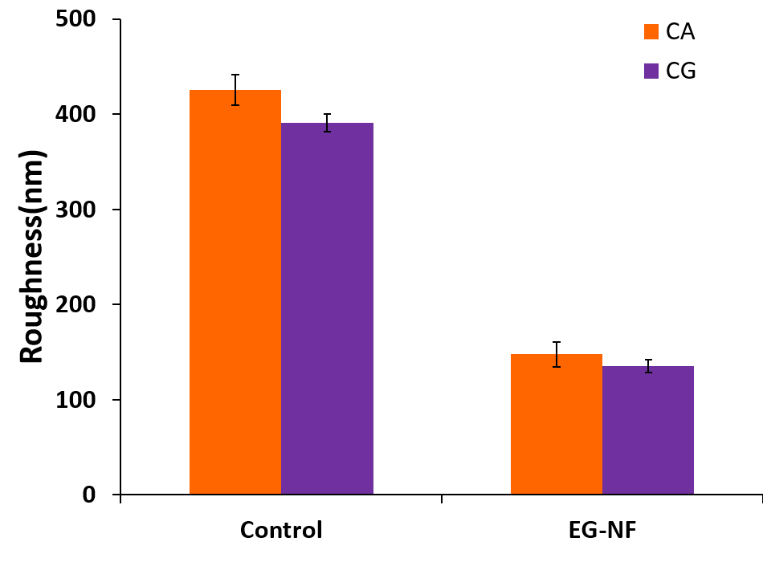


**Table S1:** biofilm inhibitory and eradication concentration of EG and EG-NF in CG and CA

| **Strains** | **EG oil** | | **EG in EG-NF** | |
| --- | --- | --- | --- | --- |
| **BIC80 (µg/mL)** | **BEC80 (µg/mL)** | **BIC80 (µg/mL)** | **BEC80 (µg/mL)** |
| **CA** | 250 | 500 | 250 | > 250 |
| **CG** | 125 | 500 | 125 | 250 |
